# Supplementary material
Source: Springer Nature journal article supplement (https://www.springermedizin.de/resource/supplementary/13063_2014_2225_MOESM1_ESM.pdf/9621662)
Supplement: MOESM1 [file 9621662]

Identify patients with cold hands sensation and confirm their eligibility (target number of patients = 14)

Randomize the participants

Experimental group (n = 7)

Acupuncture plus medication

Control group (n = 7)

medication only

- Acupuncture: 3 sessions per week
- Medication: nifedipine 5 mg daily + beraprost 20 mg three times daily

- Medication: nifedipine 5 mg daily + beraprost 20 mg three times daily

Duration of treatment: 3 weeks

Assess outcomes at baseline and at 1, 3, and 5 weeks thereafter
